# Supplementary material for: Contribution of Antibodies Against IA-2β and Zinc Transporter 8 to Classification of Diabetes Diagnosed Under 40 Years of Age
Source: PubMed Central journal article supplement — Diabetes Care. 2011 Jul 16;34(8):1760–5. doi: 10.2337/dc10-2268 (PMC3142046; doi:10.2337/dc10-2268), 2011-07-16
Supplement: supp_dc10-2268v102268_DC102268SupplementaryData.pdf [file supp_dc10-2268v102268_DC102268SupplementaryData.pdf]

## SUPPLEMENTARY DATA

### *List of the current members of the Belgian Diabetes Registry who participated in the recruitment of relatives and the handling of samples*

Abrams P, St Augustinus, Wilrijk; Algoet C, St Elisabethziekenhuis, Herentals; Arnouts P, AZ St Jozef, Turnhout; Ayoubi S, Clinique St Jean, Bruxelles; Bachy A, Clinique Notre Dame, Charleroi; Ballaux D, AZ Nikolaas, Sint-Niklaas; Baltieri D, Hôpital de Jolimont, La Louvière; Bataille G, CH du Grand Hornu-Frameries, Hornu; Beckers V, CH St Joseph, Liège; Beckers D, UCL Mt. Godinne, Yvoir; Becq H, St Augustinus, Wilrijk; Beirinckx J, St Jozefskliniek, Izegem; Beirinckx A, AZ St Lucas, Assebroek; Bellavia S, CHR de Huy, Huy; Benhalima K, UZ Leuven Gasthuisberg, Leuven; Bodson A, Polyclinique de la Madeleine, Jumet; Bosly F, Clinique St Joseph, Arlon; Bouquegneau MS, CHR Clinique St Joseph, Mons; Bourguignon JP, CHU Sart Tilman, Liège; Brussaard H, Virga Jesse Ziekenhuis, Hasselt; Buyschaert M, Clinique Univ St Luc, Bruxelles; Carlier A, AZ Maria Middelaes, Gent; Casteels K, UZ Leuven Gasthuisberg, Leuven; Cavatorta E, CHU Charleroi, Charleroi; Claessens A, Clinique St Joseph, Arlon; Claeyns C, CHU Tivoli, La Louvière; Claeyns M, St Vincentiusziekenhuis, Antwerpen; Claeyns L, AZ St Jozef, Cnop M, Hôpital Erasme, Bruxelles; Cochez P, St Augustinuskliniek, Veurne; Coeckelberghs M, Kinderziekenhuis Paola, Antwerpen; Col V, Clinique St Pierre, Ottignies; Colson A, Clinique St Pierre, Ottignies; Coolens JL, Jessaziekenhuis - Campus Salvator, Hasselt; Coremans P, AZ Nikolaas, Sint-Niklaas; Coucke W, H Hartziekenhuis, Roeselare; Crape A, OLV van Lourdes, Waregem; Crenier L, Hôpital Erasme, Bruxelles; Damoiseaux P, CH de Dinant, Dinant; Daoudi N, CHU Charleroi, Charleroi; Daper C, CHU Tivoli, La Louvière; Daubresse C, CH St Joseph, Liège; Daubresse JC, CHU Charleroi, Charleroi; De Block C, UZA, Edegem; De Feyter I, AZ De Bijloke, Gent; De Grande E, St Andriesziekenhuis, Tielt; De Paepe L, AZ Stuivenberg, Antwerpen; De Schepper J, UZ Brussel, Brussel; De Schynkel K, AZ Maria Middelaes, Gent; De Waele K, UZ Gent, Gent; De Winter P, Heilige Familie, Rumst; Decerf JA, CH de l'Ardenne, Libramont; Decochez K, UZ Brussel, Brussel; Decraene P, Imeldaziekenhuis, Bonheiden; Defoer F, Militair hospitaal, Brussel; Degrande E, St Andriesziekenhuis, Tielt; Depoorter S, AZ St Jan, Brugge; Derdelinckx L, Clinique Saint Luc, Bouge-Namur; Deweer S, St Elisabethziekenhuis, Zottegem; Dorchy H, HUDERF, Bruxelles; Dotremont H, Kalmthout; Driessens S, AZ KLINA, Brasschaat; Dumasy V, Clinique Louis Caty, Baudour; Duvivier E, Clinique Reine Fabiola, Montignies-sur-Sambre; Duyck F, H Hartziekenhuis, Roeselare; Dysseleer A, CH de l'Ardenne, Libramont; Eeckhout B, AZ St Dimpna, Geel; Emsens L, AZ OLV Ter Linden, Knokke-Heist; Engelen W, AZ Stuivenberg, Antwerpen; Ers V, Clinique St Joseph, Arlon; Eykens A, Private, Herentals; Favere N, St Elisabethziekenhuis, Zottegem; Féry F, Hôpital Erasme, Bruxelles; Fils R, Private, Blankenberge; France A, UZA, Edegem; Frankart L, Private, Ceroux-Mousty; Gaham N, CHU St Pierre, Bruxelles; Garmyn K, Private, Lier; Gérard J, CH St Joseph, Liège; Gerniers S, Private, Sint-Denijs-Westrem; Geronooz I, CHR Clinique St Joseph, Liège; Ghys C, CHU Brugmann, Bruxelles; Gies I, UZ Brussel, Brussel; Gillet C, CHU Brugmann, Bruxelles; Giri M, UZ Gent, Gent; Godon E, CHR de Huy, Huy; Guiot J, Hôpital du Bois de l'Abbaye, Seraing; Haemers S, AZ St Lucas, Gent; Haumont S, Hôpital Erasme, Bruxelles; Herbaut C, CHU Brugmann, Bruxelles; Heureux F, Clinique St Elisabeth, Namur; Heyns E, AZ Groeninge Campus OLV, Kortrijk; Huard A, Hôpital de Braine l'Alleud, Braine l'Alleud; Hubermont G, Clinique Princesse Paola, Marche; Jandrain B, CHU Sart Tilman, Liège; Joosen P, AZ St Jozef, Turnhout; Jopart P, Hôpital de Jolimont, Haine-St-Paul; Jousten E, CHR de la Citadelle, Liège; Karmali R, CHU Brugmann, Bruxelles; Keymeulen K, UZ Brussel, Brussel; Kleynen P, HU Brugmann, Bruxelles; Kockaerts Y, ZOL Campus A. Dumont, Genk; Krzentowski G, Polyclinique de la Madeleine, Jumet; Laga K, St Franciscus Ziekenhuis, Heusden- Zolder; Lamberigts G, AZ St Jan, Brugge; Lambrecht E, AZ Waasland, Sint Niklaas; Lamkanfi F, UZ Brussel, Brussel; Lebrethon MC, CHR de la Citadelle, Liège; Lemay P, AZ Sint-Jozef, Turnhout; Lemy C, CHU Charleroi, Charleroi; Leus J, AZ Maria Middelaes, Gent; Lienart F, CHU Tivoli, La Louvière; Lim TT, Heilig Hart Ziekenhuis, Mol; Litvine C, CHR Clinique St Joseph, Mons; Logghe K, H Hartziekenhuis, Roeselare; Louis J, Clinique Notre Dame, Charleroi; Maes M, Clinique Univ St Luc, Bruxelles; Marchal M, CHU Tivoli, La Louvière; Marien P, St Augustinus, Wilrijk; Martens M, AZ Sint-Jozef, Turnhout; Massa G, Virga Jesse Ziekenhuis, Hasselt; Massaad D, UZ Brussel, Brussel; Mathieu C, UZ Leuven Gasthuisberg, Leuven; Mathijs Z, Algemeen Stedelijk Ziekenhuis, Geraardsbergen; Maus Y, Clinique Notre Dame, Charleroi; Mekahli F, Clinique St Jean, Bruxelles; Mekeirele K, OLV van Lourdes, Waregem; Mertens A, Regionaal Ziekenhuis Sint Trudo, Sint-Truiden; Messaoui A, HUDERF, Bruxelles; Monballyu J, AZ St Jozef, Malle; Moorkens G, UZA, Edegem; Mouraux T, HUDERF, Bruxelles; Naudts K, St Elisabethziekenhuis, Zottegem; Nemery A, CHU Ambroise Paré, Mons; Neven I, Clinique Notre Dame, Hermalle /s Argenteau; Nicolaij D, AZ Groeninge Campus OLV, Kortrijk;

## SUPPLEMENTARY DATA

Nobels F, OLV Ziekenhuis, Aalst; Nollet A, Regionaal Ziekenhuis Jan Yperman, Ieper; Ooms V, AZ KLINA, Brasschaat; Oriot P, CH de Mouscron, Mouscron; Paciorkowski F, Montigny-le-Tilleul; Paquot N, CH St Joseph, Liège; Paris I, Clinique Notre Dame, Charleroi; Peeters G, Jan Palfijnziekenhuis, Merksem; Peiffer F, UZA, Edegem; Pelckmans C, AZ St Maarten Campus Duffel, Duffel; Philips JC, CHU Sart Tilman, Liège; Pieron M, CH Peltzer-La Tourelle, Verviers; Poelmans L, OLV Middelaars, Deurne; Ponchon M, Clinique St Jean, Bruxelles; Poschet K, St Vincentiusziekenhuis, Antwerpen; Remacle B, Clinique de l'Espérance, Montegnée; Remy C, CHR de la Citadelle, Liège; Renneboog B, CH Tubize-Nivelles, Nivelles; Righes C, CHR de Huy, Huy; Robbrecht S, AZ St Blasius, Dendermonde; Rocour-Brumioul D, CHR de la Citadelle, Liège; Roland D, CHU Tivoli, La Louvière; Rooman R, UZA, Edegem; Ruige J, UZ Gent, Gent; Scarniere D, Hôpital St Joseph, Gilly; Scheen A, CHU Sart Tilman, Liège; Schils E, CHU Tivoli, La Louvière; Schoemaker I, Heilig Hartziekenhuis, Lier; Selvais P, Maulde (Tournai); Seret N, CH St Joseph, Liège; Spijker T, St Jozefkliniek, Bornem; Spincemaille K, H Hartziekenhuis, Roeselare; Stassen-Joly MP, Clinique Andre Renard, Herstal; Strivay M, CHR de la Citadelle, Liège; Struelens M, CH Molière Longchamp, Bruxelles; Taelman P, AZ Maria Middelaars, Gent; Tenoutasse S, HUDERF, Bruxelles; Terriere L, ZNA Site Hoge Beuken, Hoboken; Teuwen J, AZ KLINA, Brasschaat; Thenaers G, AZ Vesalius, Tongeren; Thiry-Counson G, CH St Joseph, Liège; Tits J, ZOL Campus A. Dumont, Genk; Triches K, Hôpital du Bois de l' Abbaye, Seraing; Tshibuabua G, CH de la Basse Sambre, Sambreville; T'sjoen G, UZ Gent, Gent; Tuytens C, AZ St Lucas, Gent; Unger J, CH Tubize-Nivelles, Nivelles, Unuane D, UZ Brussel, Brussel; Van Acker K, AZ Heilige Familie, Rumst; Van Aken E, AZ Diest, Diest; Van Aken S, UZ Gent, Gent; Van Crombrugge P, OLV Ziekenhuis, Aalst; Van de Poel G, UCL Mt. Godinne, Yvoir; Van Den Bruel A, AZ St Jan, Brugge; Van Doninck N, AZ Nikolaas, Sint-Niklaas; Van Doorn J, H Hartziekenhuis, Lier; Van Gaal L, UZA, Edegem; Van Helvoirt M, Private, De Haan; Van Imschoot S, AZ St Jan, Brugge; Van Parys C, RHMS Site Peruwelz, Peruwelz; Van Pottelbergh I, OLV Ziekenhuis, Aalst; Van Poucke K, AZ Nikolaas, Sint-Niklaas; Van Rooy P, ZNA Middelheim, Antwerpen; Van Winghem C, OLV Middelaars, Deurne; Vanbesien J, UZ Brussel, Brussel; Vande Mergel X, CH Tubize-Nivelles, Nivelles; Vandecaeter H, AZ Alma, Sijsele-Damme; Vandemeulebroucke E, UZ Brussel, Brussel; Vandenbon C, AZ Damiaan - Campus H. Hart, Oostende; Vandenbroeck P, St Jozefskliniek, Izegem; Vandenbroucke M, AZ St Maarten Campus Mechelen, Mechelen; Vandenbussche E, St Elisabethziekenhuis, Herentals; Vandergheynst A, Hôpital Erasme, Bruxelles; Vanderijst JF, Clinique St Pierre, Ottignies; Vanderijst M, Private, Wavre; Vanderstappen H, St Franciscus Ziekenhuis, Heusden-Zolder; Vandewalle C, ZNA Middelheim, Antwerpen; Vanfleteren E, St Jozefskliniek, Izegem; Vanhaverbeke G, AZ Groeninge Campus OLV, Kortrijk; Vanneste S, AZ St Jozef, Malle; Vanuytsel J, AZ Zusters van Barmhartigheid, Ronse; Verbiest R, AZ St Dimpna, Geel; Vercammen C, Imeldaziekenhuis, Bonheiden; Vergauwe P, AZ Groeninge Campus OLV, Kortrijk; Verhaegen A, Jan Palfijnziekenhuis, Merksem; Verhaert G, AZ Monica, Antwerpen; Verjans V, AZ St Jozef, Turnhout; Verniest R, AZ KLINA, Brasschaat; Vets B, Imeldaziekenhuis, Bonheiden; Vieillevoye G, Clinique Notre Dame, Charleroi; Vinck W, St Augustinus, Wilrijk; Vinckx J, Imeldaziekenhuis, Bonheiden; Vinken S, ASZ, Aalst; Warnotte C, Clinique Notre Dame de Grace, Gosselies; Watillon P, Clinique Notre Dame de Grace, Gosselies; Weber E, Clinique St Joseph, Arlon; Weemaes I, Private, Turnhout; Weets I, UZ Brussel, Brussel; Winne L, AZ Damiaan - Campus H. Hart, Oostende; Woestenburger A, AZ St Jozef, Malle

SUPPLEMENTARY DATA

**Supplementary Table 1.** Prevalence of IA-2βA and ZnT8A in 157 new onset diabetic patients and 24 healthy controls with solitary positivity for IAA, GADA or IA-2A (1 Ab<sup>+</sup> only) according to age

| Antibody status                                                     | Prevalence               |                           |          |           |
|---------------------------------------------------------------------|--------------------------|---------------------------|----------|-----------|
|                                                                     | Patients                 |                           | Controls |           |
|                                                                     | 0-14 yrs                 | 15-39 yrs                 | 0-14 yrs | 15-39 yrs |
| IA-2βA <sup>+</sup> in 1Ab <sup>+</sup> group                       | 11/54 (20)               | 16/103 (16)               | 0/9 (0)  | 0/15 (0)  |
| ZnT8A <sup>+</sup> in 1Ab <sup>+</sup> group                        | 29/54 (54) <sup>**</sup> | 41/103 (40) <sup>†‡</sup> | 0/9 (0)  | 0/15 (0)  |
| IA-2βA <sup>+</sup> or ZnT8A <sup>+</sup> in 1Ab <sup>+</sup> group | 32/54 (59) <sup>**</sup> | 46/103 (45) <sup>†‡</sup> | 0/9 (0)  | 0/15 (0)  |

Data are n/n (%); threshold for significance chi-square test:  $P < 0.05/12$  or  $P < 0.004$  (Bonferroni correction); \*  $P < 0.001$  vs. controls 0-14 yrs, †  $P < 0.001$  vs. controls 15-39 yrs; threshold for significance McNemar test:  $P < 0.05/12$  or  $P < 0.004$ ; ‡  $P < 0.001$  vs. IA-2βA<sup>+</sup> patients in same age groups

**Supplementary Table 2.** Metabolic data in 492 new-onset diabetic patients stratified according to age and IA-2βA or ZnT8A status

| Age group | Antibody status     | n   | C-peptide (nmol/l)        | Ketonuria |
|-----------|---------------------|-----|---------------------------|-----------|
|           |                     |     | Median (IQR) <sup>*</sup> | n (%)     |
| 0-14 yrs  | IA-2βA <sup>+</sup> | 131 | 0.15 (0.08 – 0.22)        | 110 (84)  |
|           | IA-2βA <sup>-</sup> | 112 | 0.15 (0.09 – 0.23)        | 89 (79)   |
| 15-39 yrs | IA-2βA <sup>+</sup> | 72  | 0.17 (0.11 – 0.26)        | 59 (82)   |
|           | IA-2βA <sup>-</sup> | 177 | 0.18 (0.09 – 0.31)        | 128 (72)  |
| 0-14 yrs  | ZnT8A <sup>+</sup>  | 159 | 0.14 (0.08 – 0.23)        | 131 (82)  |
|           | ZnT8A <sup>-</sup>  | 84  | 0.15 (0.09 – 0.23)        | 68 (81)   |
| 15-39 yrs | ZnT8A <sup>+</sup>  | 127 | 0.17 (0.09 – 0.26)        | 100 (79)  |
|           | ZnT8A <sup>-</sup>  | 122 | 0.18 (0.10 – 0.33)        | 87 (71)   |

\* interquartile range

SUPPLEMENTARY DATA

**Supplementary Table 3.** Linear regression analysis in 492 new-onset diabetic patients

| Dependent variable | Independent variable | Univariate | Multivariate (enter) |                      |
|--------------------|----------------------|------------|----------------------|----------------------|
|                    |                      | <i>P</i>   | <i>P</i>             | $\beta$              |
| log [C-peptide]    | Age                  | < 0.001    | 0.027                | 0.004 (0.001; 0.008) |
|                    | Sex                  | 0.079      | NT*                  | -                    |
|                    | <i>HLA-DQ2</i>       | 0.019      | 0.077                | -0.06 (-0.13; 0.01)  |
|                    | <i>HLA-DQ8</i>       | 0.599      | NT*                  | -                    |
|                    | Ketonuria            | < 0.001    | < 0.001              | -0.06 (-0.13; 0.01)  |
|                    | log [IAA]            | 0.051      | NT*                  | -                    |
|                    | log [GADA]           | 0.027      | 0.381                | -0.02 (-0.06; 0.02)  |
|                    | log [IA-2A]          | 0.012      | 0.499                | 0.01 (-0.03; 0.05)   |
|                    | log [ZnT8A]          | 0.041      | 0.840                | 0.01 (-0.05; 0.06)   |
|                    | log [IA-2 $\beta$ A] | 0.073      | NT*                  | -                    |
|                    | number Abs           | < 0.001    | 0.122                | -0.03 (-0.07; 0.01)  |

\* not tested
